# Supplementary material for: Hydroquinine Enhances the Efficacy of Contact Lens Solutions for Inhibiting Pseudomonas aeruginosa Adhesion and Biofilm Formation
Source: MDPI journal article supplement (doi:10.3390/antibiotics13010056), 2024-01-05
Supplement: s1 [file s1]

**Table S1.** Differentially expressed genes (DEGs) associated with adhesion as determined by transcriptome analysis [1].

| Gene name   | Product name                            | Log <sub>2</sub> FC <sup>1</sup> | FDR <sup>2</sup>        | p-value                 |
|-------------|-----------------------------------------|----------------------------------|-------------------------|-------------------------|
| <i>cgrC</i> | cupA gene regulator C, CgrC             | -2.48                            | 1.57 x 10 <sup>-2</sup> | 5.00 x 10 <sup>-4</sup> |
| <i>cheY</i> | two-component response regulator CheY   | -2.16                            | 4.13 x 10 <sup>-2</sup> | 1.80 x 10 <sup>-3</sup> |
| <i>cheZ</i> | chemotaxis protein CheZ                 | -2.46                            | 2.26 x 10 <sup>-2</sup> | 7.00 x 10 <sup>-4</sup> |
| <i>fimU</i> | type 4 fimbrial biogenesis protein FimU | -2.39                            | 2.57 x 10 <sup>-2</sup> | 9.00 x 10 <sup>-4</sup> |
| <i>pilV</i> | type 4 fimbrial biogenesis protein PilV | -2.27                            | 3.55 x 10 <sup>-2</sup> | 1.40 x 10 <sup>-3</sup> |

<sup>1</sup>Log<sub>2</sub> FC, Log<sub>2</sub> relative fold changes of the gene expression levels in response to hydroquinine, compared to the untreated control. <sup>2</sup>FDR, false discovery rate showed statistical significances.

## Reference

1. Rattanachak, N.; Weawsiangsang, S.; Daowtak, K.; Thongsri, Y.; Ross, S.; Ross, G.; Nilsri, N.; Baldock, R.A.; Pongcharoen, S.; Jongjitvimol, T.; et al. High-throughput transcriptomic profiling reveals the inhibitory effect of hydroquinine on virulence factors in *Pseudomonas aeruginosa*. *Antibiotics*. **2022**, *11*, 1436, doi:10.3390/antibiotics11101436.
